# Supplementary material for: Simulation study of membrane bending by protein crowding: a case study with the epsin N-terminal homology domain
Source: Royal Society of Chemistry journal article supplement (doi:10.1039/d3sm00280b), 2023-01-01
Supplement: d3sm00280b1.pdf [file d3sm00280b1.pdf]

# Supporting Information for Simulation Study of Membrane Bending by Protein Crowding: A Case Study with the Epsin N-terminal Homology Domain

Tarakanath Mandal\*, Shivam Gupta , and Jatin Soni

Department of Physics, Indian Institute of Technology Kanpur, Kanpur-208016, India.

\*tarakanath@iitk.ac.in

Table 1: Summary of the simulations performed in this study. Bold numerical numbers indicates the number of replicas performed.

| System                                                                             | Number of lipids | Number of proteins | Total number of atoms/beads | Simulation time( $\mu$ s) |
|------------------------------------------------------------------------------------|------------------|--------------------|-----------------------------|---------------------------|
| Membrane-protein interface: <b>1</b><br>ENTH with $H_0$ (HMMM-AT)                  | 162              | 1                  | 81066                       | 0.1                       |
| Membrane-protein interface: <b>1</b><br>ENTH with $H_0$ (AT)                       | 162              | 1                  | 74407                       | 0.5                       |
| Membrane-protein interface <b>1</b><br>ENTH without $H_0$ (HMMM-AT)                | 162              | 1                  | 79007                       | 0.1                       |
| Membrane-protein interface: <b>1</b><br>ENTH without $H_0$ (AT)                    | 162              | 1                  | 75575                       | 0.3                       |
| Membrane-protein interface: <b>3</b><br>ENTH with $H_0$ (CG, no elastic network)   | 2000             | 1                  | 69376                       | 10                        |
| Membrane-protein interface: <b>3</b><br>ENTH with $H_0$ (CG, with elastic network) | 2000             | 1                  | 69376                       | 10                        |
| Curvature generation by two<br>ENTH domain with $H_0$ (CG): <b>1</b>               | 2000             | 2                  | 70033                       | 10                        |
| Curvature generation by two<br>ENTH domain without $H_0$ (CG): <b>1</b>            | 2000             | 2                  | 71360                       | 10                        |
| Curvature sensing by ENTH<br>with $H_0$ (CG): <b>3</b>                             | 3200             | 1                  | 150617                      | 5                         |
| Curvature sensing by ENTH<br>without $H_0$ (CG): <b>3</b>                          | 3200             | 1                  | 150582                      | 6                         |
| Curvature generation by four<br>ENTH domain with $H_0$ (CG): <b>1</b>              | 8000             | 4                  | 382038                      | 10                        |
| Curvature generation by sixteen<br>ENTH domain with $H_0$ (CG): <b>1</b>           | 8000             | 16                 | 389834                      | 10                        |
| Curvature generation by sixteen<br>ENTH domain without $H_0$ (CG): <b>1</b>        | 8000             | 16                 | 392676                      | 10                        |
| Partial pressure in the presence of<br>ENTH domain with $H_0$ (CG): <b>1</b>       | 1240             | 48                 | 91941                       | 2                         |
| Partial pressure in the presence of<br>ENTH domain without $H_0$ (CG): <b>1</b>    | 1240             | 48                 | 91761                       | 2                         |
| Aggregation of proteins<br>ENTH domain with $H_0$ (CG): <b>1</b>                   | 18000            | 16                 | 940302                      | 20                        |
| Aggregation of proteins<br>ENTH domain with $H_0$ (CG): <b>2</b>                   | 18000            | 16                 | 962152                      | 20                        |
| Membrane curvature with no protein (CG): <b>1</b>                                  | 18000            | 0                  | 956968                      | 3                         |
| Membrane curvature generation (AT): <b>1</b>                                       | 1440             | 4                  | 572832                      | 0.12                      |

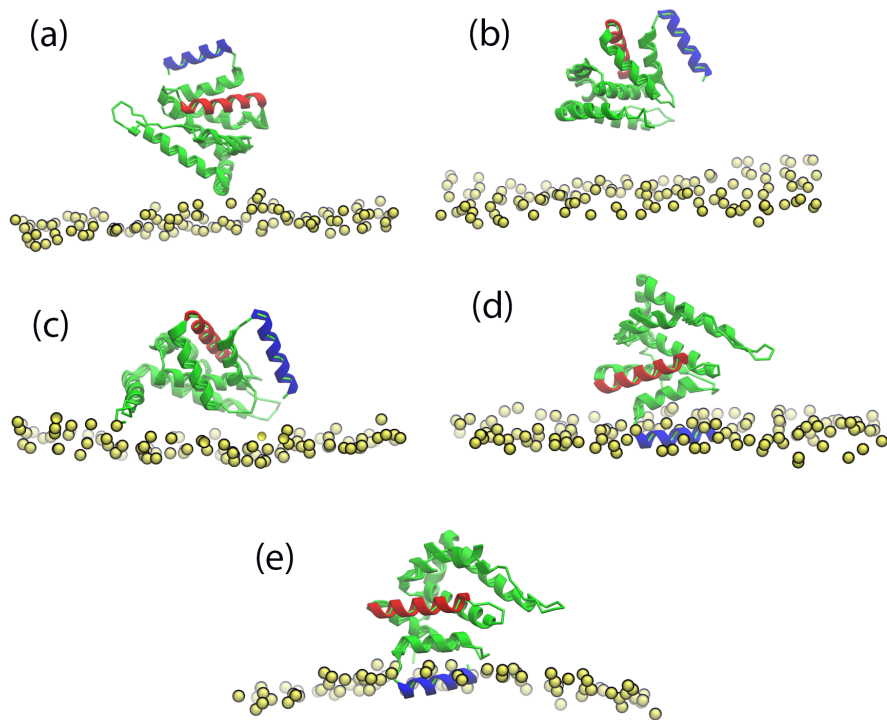

Figure S1: Simulation of the ENTH protein and membrane interaction with a different initial configuration where the  $H_0$  helix (blue) is away from the membrane surface. With simulation time the protein spontaneously rotates and binds to the membrane through the  $H_0$  helix. Snapshots are shown at (a) 0, (b) 0.4, (c) 0.5, (d) 0.6 and (e) 5.0  $\mu s$ .

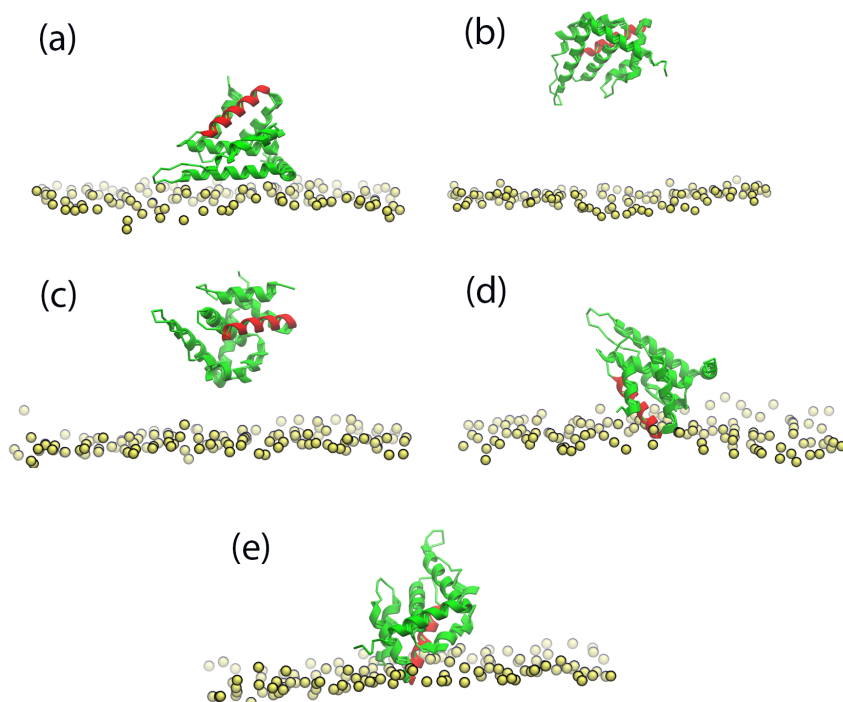

Figure S2: Simulation of the ENTH- $H_0$  protein and membrane interaction with a different initial configuration where the  $H_3$  helix (red) is away from the membrane surface. With simulation time the protein spontaneously rotates and binds to the membrane through the  $H_3$  helix. Snapshots are shown at (a) 0, (b) 1.0, (c) 1.15, (d) 1.5 and (e) 5.0  $\mu s$ .

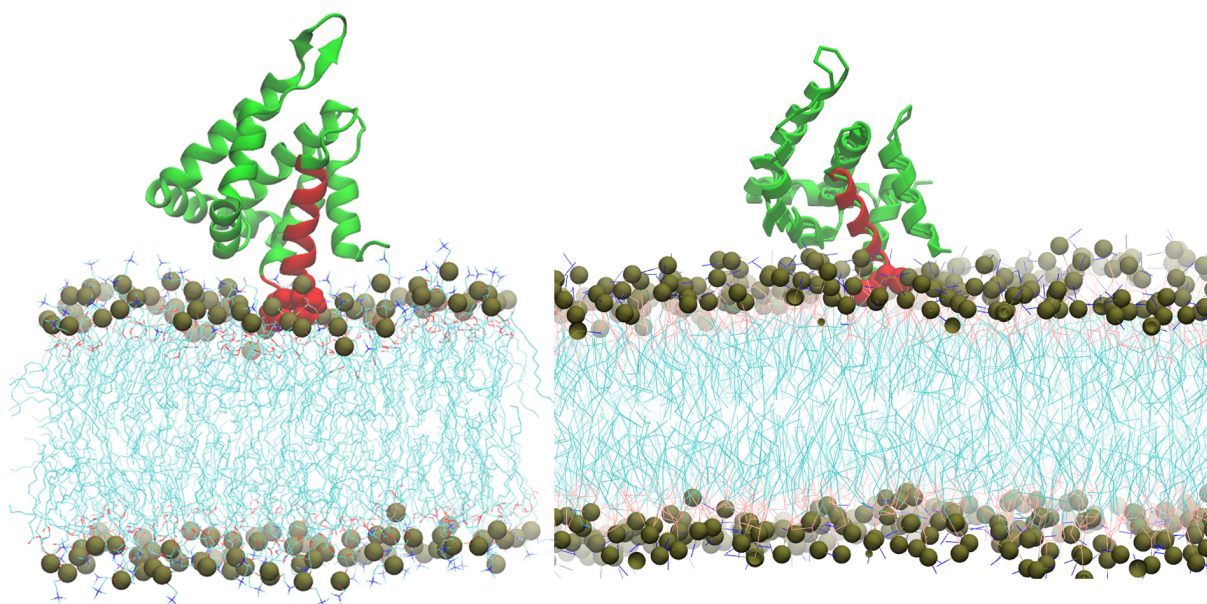

Figure S3: Equilibrated snapshots of the protein-membrane interface in the absence of  $H_0$  helix (ENTH- $H_0$  domain), obtained from the (left) atomistic and (right) coarse-grained simulations. Red color indicates the  $H_3$  helix. Residue 50VAL of the  $H_3$  is highlighted by the red spheres. Water and ions are removed for clarity.

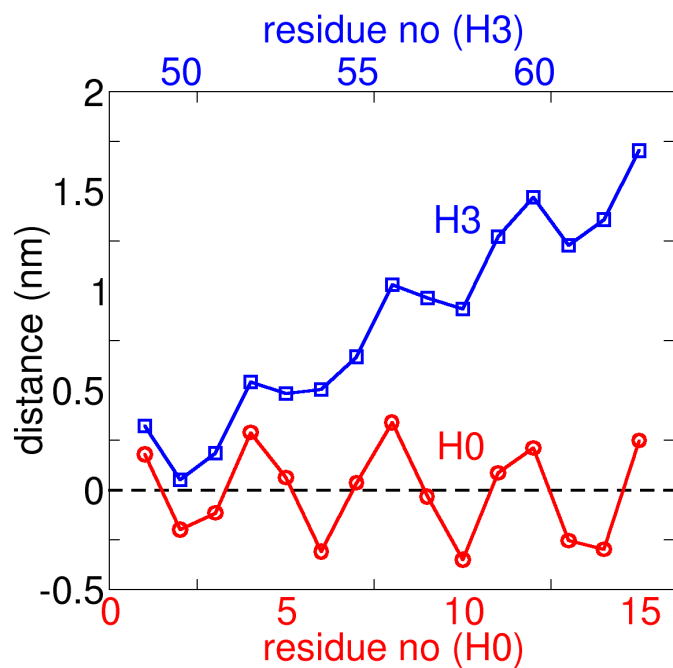

Figure S4: (Red) Distances of different residues of the  $H_0$  helix from the top PO4 layer when the ENTH domain binds with the membrane through  $H_0$  helix. (Blue) Distances of different residues of the  $H_3$  helix from the top PO4 layer when the ENTH domain binds with the membrane through  $H_3$  helix, in the absence of  $H_0$  helix. In the later case, fewer number of residues are engaged in membrane binding, thus binding strength is likely to be less compared to the former case, where ENTH binds with the membrane through  $H_0$ .

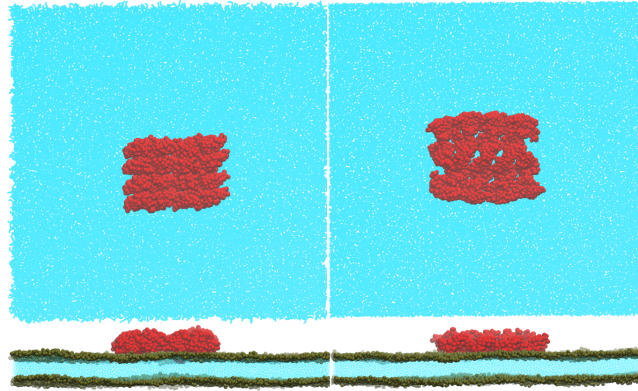

Figure S5: Initial structures of the protein-membrane complex used for calculating membrane curvature induced by sixteen (left) ENTH and (right) ENTH- $H_0$  domains. Red and cyan color represent the protein and membrane, respectively. Water and ions are not shown for clarity. Bottom panel shows the side view of the protein-membrane complex.

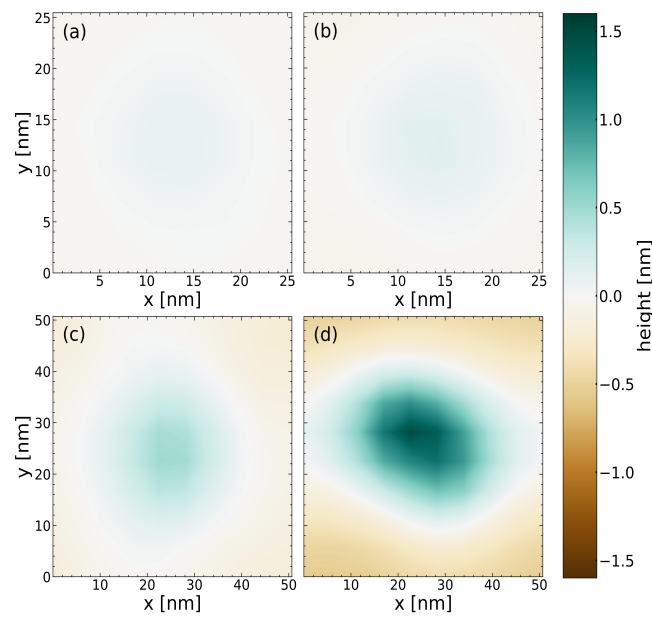

Figure S6: Membrane height profile in the presence of (a) one (b) two (c) four and (d) sixteen ENTH domains with the  $H_0$  helix.

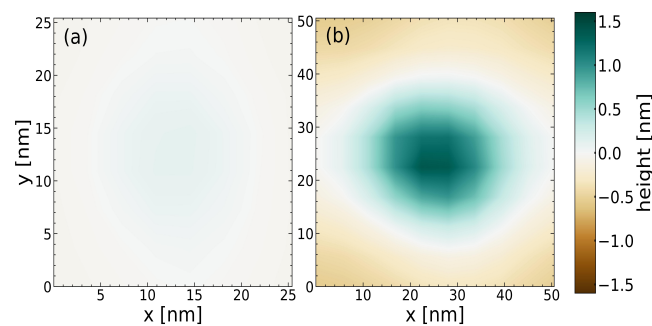

Figure S7: Membrane height profile in the presence of (a) one and (b) sixteen ENTH domains without the  $H_0$  helix (ENTH- $H_0$  domains).

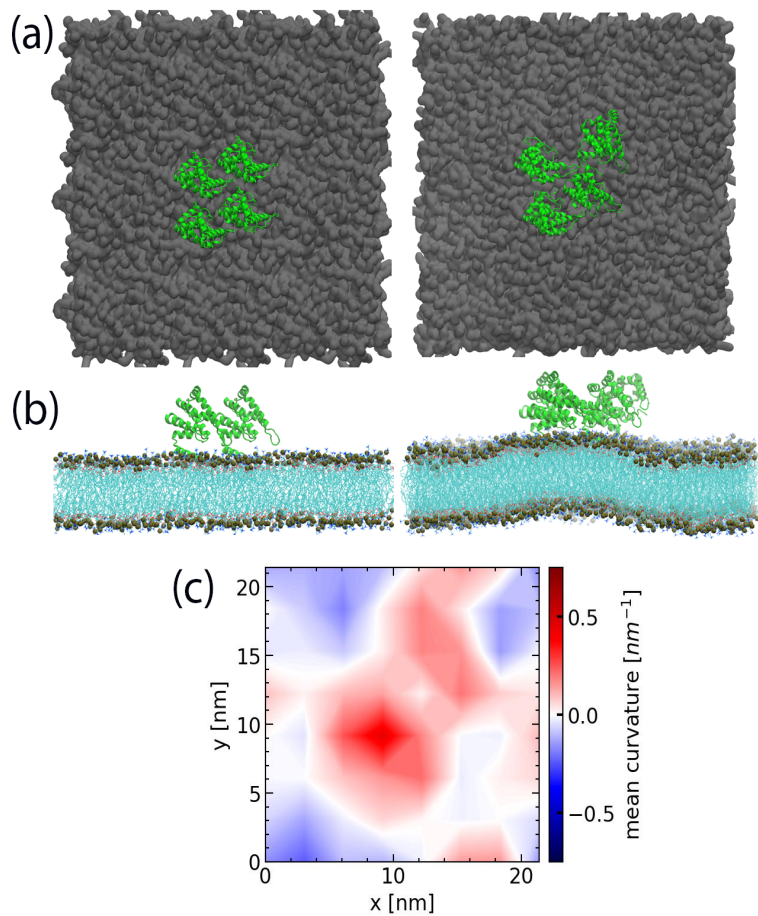

Figure S8: Atomistic simulation of the membrane curvature induced by a protein cluster. (a) Top view of the (left) initial and (right) equilibrated structure of the protein-membrane complex. The protein cluster maintains its compactness throughout the simulation. (b) Side view of the (left) initial and (right) equilibrated structure of the protein-membrane complex. (c) 2D plot of the membrane curvature. A positive curvature is generated by the protein at the membrane center.

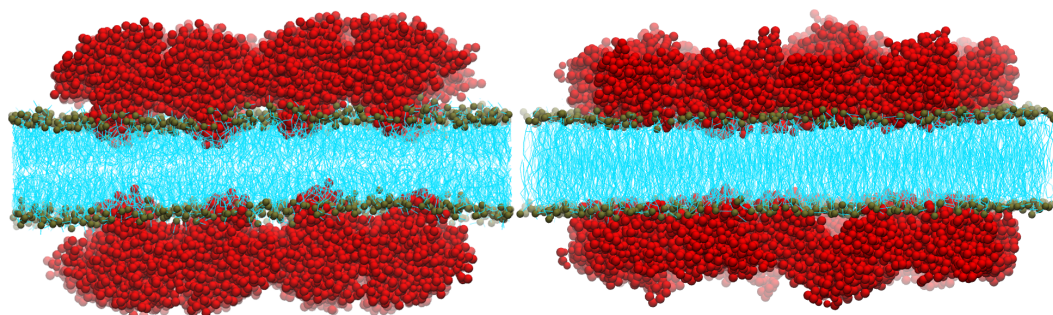

Figure S9: Initial structures of the protein-membrane complex used for the calculations of lateral pressure profile of the membrane in the presence of (left) ENTH and (right) ENTH- $H_0$  domains. Red and cyan color represent the protein and membrane, respectively. Water and ions are not shown for clarity. In both the cases there are a total of 48 proteins, 24 on each of the leaflets.

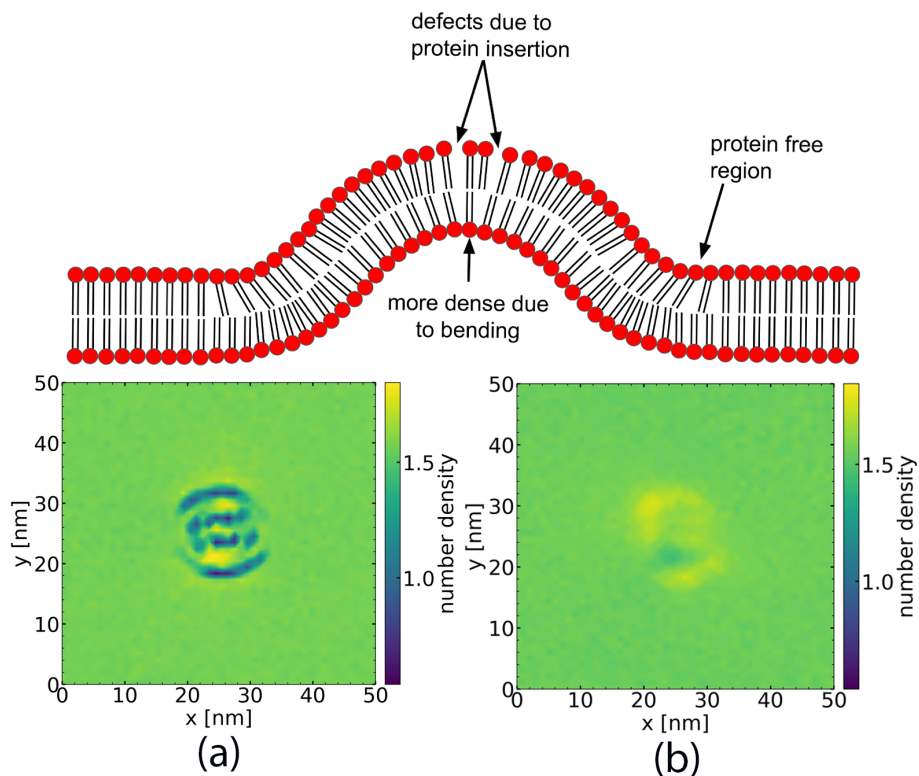

Figure S10: (top) schematic showing the membrane packing defects due to protein insertion. Lipids are relatively less dense in the protein binding region, and lipids are relatively more dense beneath the protein bound region. (Bottom) Number density of the PO4 beads for the (a) upper (protein bound) leaflet and (b) lower leaflet.

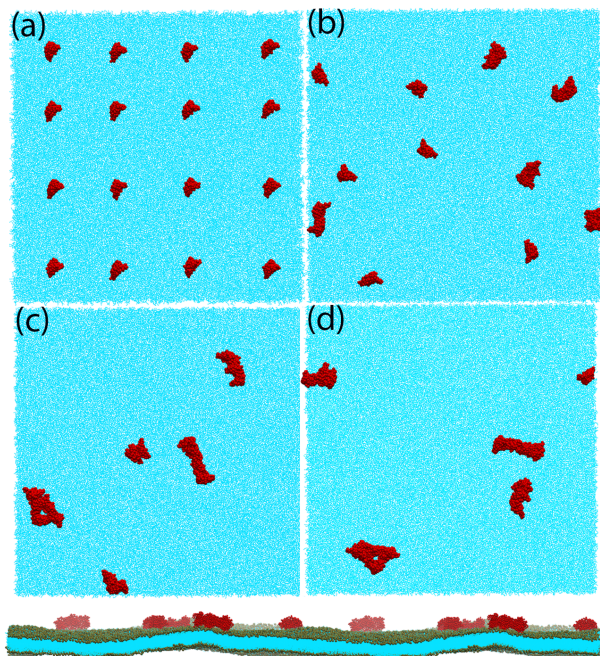

Figure S11: Aggregation of the proteins on the membrane surface. Sixteen ENTH domains are initially placed far away from each other on top of a  $75 \text{ nm} \times 75 \text{ nm}$  bilayer. Equilibrated structure of the protein-membrane complex at (a)  $0 \mu s$  (b)  $3 \mu s$  (c)  $10 \mu s$  and (d)  $20 \mu s$ . Cyan and red represent the membrane and proteins, respectively. Water and ions are removed for clarity. Proteins are not completely aggregated yet within  $20 \mu s$  long simulation, but are very likely to aggregate completely in a longer simulation.

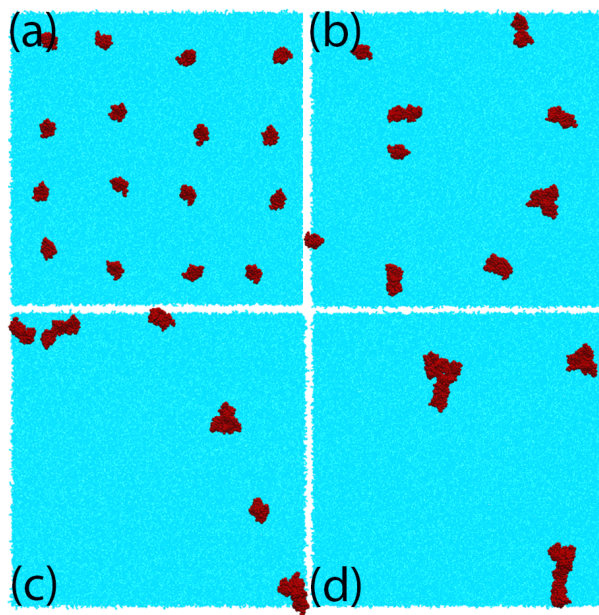

Figure S12: An independent simulation result showing the aggregation of the ENTH- $H_0$  on the membrane surface. Sixteen ENTH- $H_0$  domains are initially placed far away from each other on top of a  $75 \text{ nm} \times 75 \text{ nm}$  bilayer. Equilibrated structure of the protein-membrane complex at (a)  $0 \mu\text{s}$  (b)  $3 \mu\text{s}$  (c)  $10 \mu\text{s}$  and (d)  $20 \mu\text{s}$ . Cyan and red represent the membrane and proteins, respectively. Water and ions are removed for clarity. Proteins are not completely aggregated yet within  $20 \mu\text{s}$  long simulation, but are very likely to aggregate completely in a longer simulation.
